# Supplementary material for: Simultaneous removal of Sb(iii) and Cd(ii) in water by adsorption onto a MnFe2O4–biochar nanocomposite
Source: Royal Society of Chemistry journal article supplement (doi:10.1039/c7ra13151h), 2018-01-01
Supplement: c7ra13151h1.pdf [file c7ra13151h1.pdf]

## **Simultaneous removal of Sb(III) and Cd(II) in water by adsorption onto MnFe<sub>2</sub>O<sub>4</sub>-biochar nanocomposites**

Yu-Ying Wang<sup>1,2</sup>, Hai-Yang Ji<sup>1,3</sup>, Hao-Hao Lu<sup>1,2</sup>, Yu-Xue Liu<sup>1,2</sup>, Rui-Qin Yang<sup>4,5</sup>, Sheng-  
Mao Yang<sup>1,2\*</sup>

<sup>1</sup> Institute of Environment, Resource, Soil, and Fertilizer, Zhejiang Academy of Agricultural Sciences, Hangzhou, 310021, P. R. China

<sup>2</sup> Engineering Research Center of Biochar of Zhejiang Province, Hangzhou, 310021, P. R. China

<sup>3</sup> College of Chemistry and Life Sciences, Zhejiang Normal University, Jinhua, 321004, P. R. China

<sup>4</sup> Zhejiang Provincial Collaborative Innovation Center of Agricultural Biological Resources Biochemical Manufacturing, Zhejiang University of Science and Technology, Hangzhou, 310023, P. R. China

<sup>5</sup> Zhejiang Provincial Key Lab for Chem&Bio Processing Technology of Farm Product, Zhejiang University of Science and Technology, Hangzhou, 310023, P. R. China

### **Supplementary Materials:**

Supplementary Table and Figure

**Table S1** Langmuir and Freundlich parameters for Sb(III) or Cd(II) adsorbed by BC and MnFe<sub>2</sub>O<sub>4</sub>-BC in the single metal system.

| Sample                               | Ion     | Langmuir constants             |                                    |       | Freundlich constants                                               |      |       |
|--------------------------------------|---------|--------------------------------|------------------------------------|-------|--------------------------------------------------------------------|------|-------|
|                                      |         | $K_L$<br>(L·mg <sup>-1</sup> ) | $q_{max}$<br>(mg·g <sup>-1</sup> ) | $R^2$ | $K_F$<br>(mg·g <sup>-1</sup> )(L·mg <sup>-1</sup> ) <sup>1/n</sup> | $n$  | $R^2$ |
| BC                                   | Sb(III) | —                              | —                                  | —     | —                                                                  | —    | —     |
| BC                                   | Cd(II)  | 0.00986                        | 99.40                              | 0.968 | 2.531                                                              | 1.63 | 0.873 |
| MnFe <sub>2</sub> O <sub>4</sub> -BC | Sb(III) | 0.0171                         | 159.48                             | 0.921 | 6.289                                                              | 1.74 | 0.801 |
| MnFe <sub>2</sub> O <sub>4</sub> -BC | Cd(II)  | 0.0598                         | 122.10                             | 0.990 | 27.69                                                              | 3.89 | 0.866 |

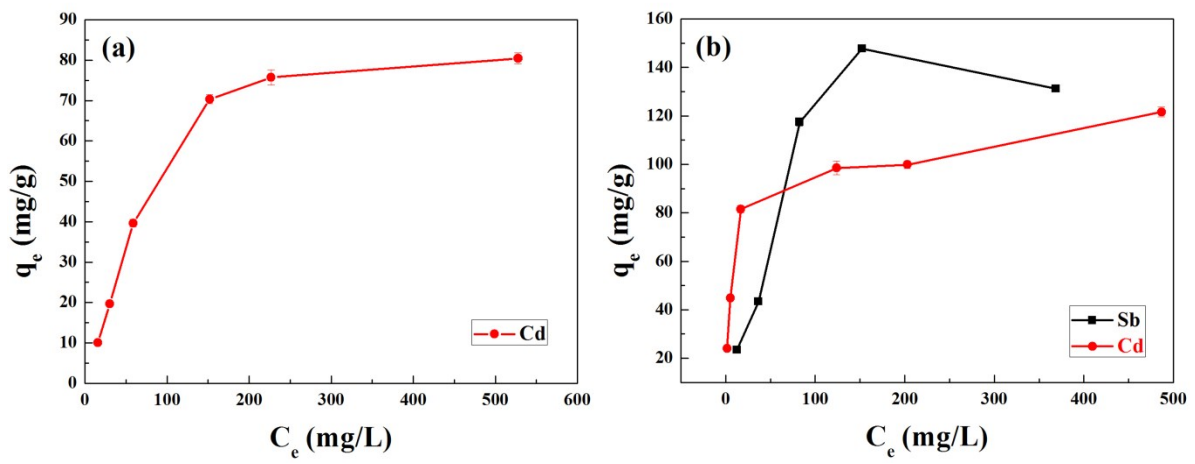

Figure S1 Effect of initial concentration on the removal of Sb (III) and Cd(II) at pH 7.0 by (a) BC and (b) MnFe<sub>2</sub>O<sub>4</sub>-BC in single system

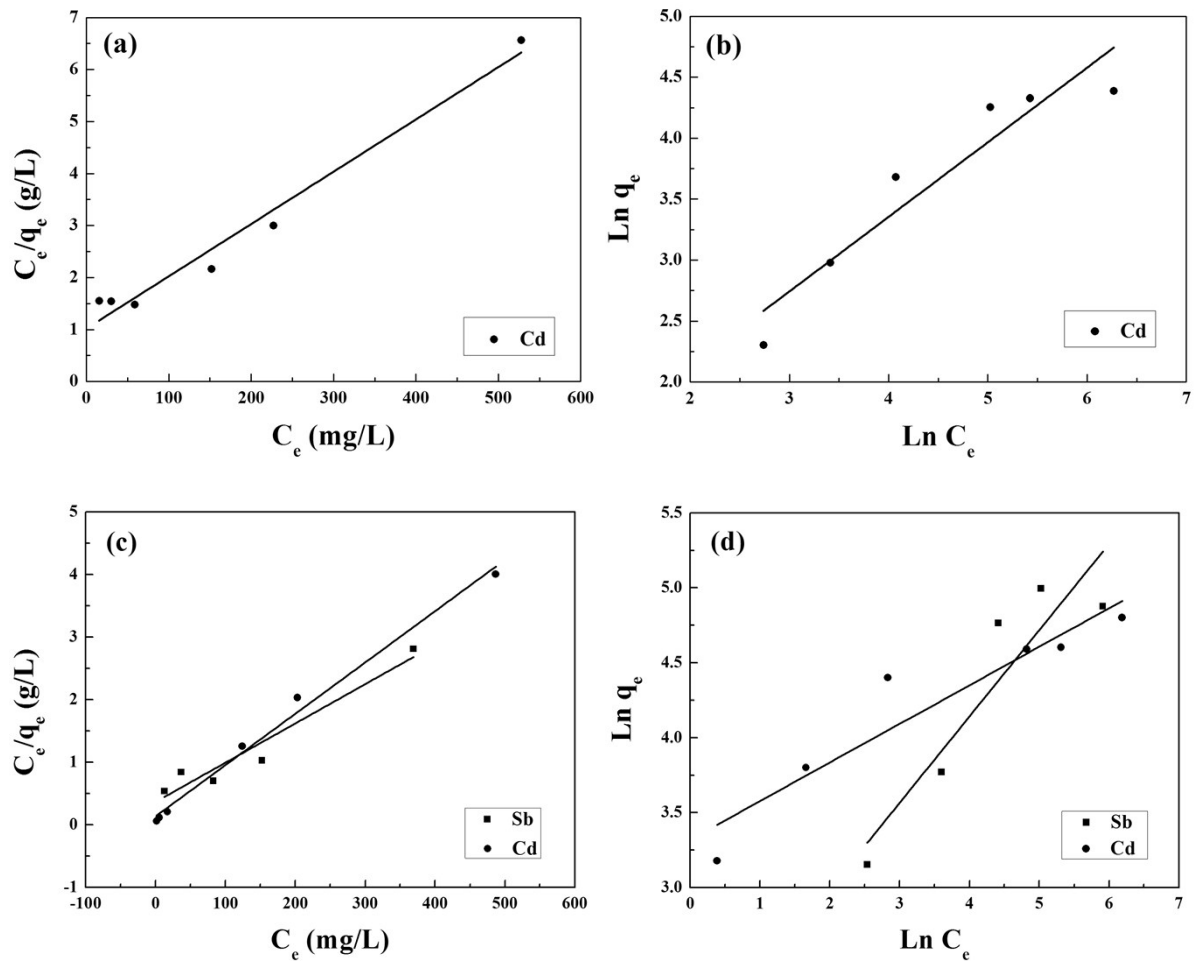

Figure S2 (a and c) Langmuir and (b and d) Freundlich isotherms for Sb (III) and Cd(II) adsorption onto (a and b) BC and (c and d) MnFe<sub>2</sub>O<sub>4</sub>-BC in single system.
